# Supplementary material for: Leukocyte telomere length and attrition in association with disease severity in cystic fibrosis patients
Source: publisher site journal article supplement (doi:10.18632/aging.206093), 2024-08-29
Supplement: Supplementary file [file aging-v16i16-206093-supplementary-material-SD2.pdf]

## SUPPLEMENTARY FIGURE

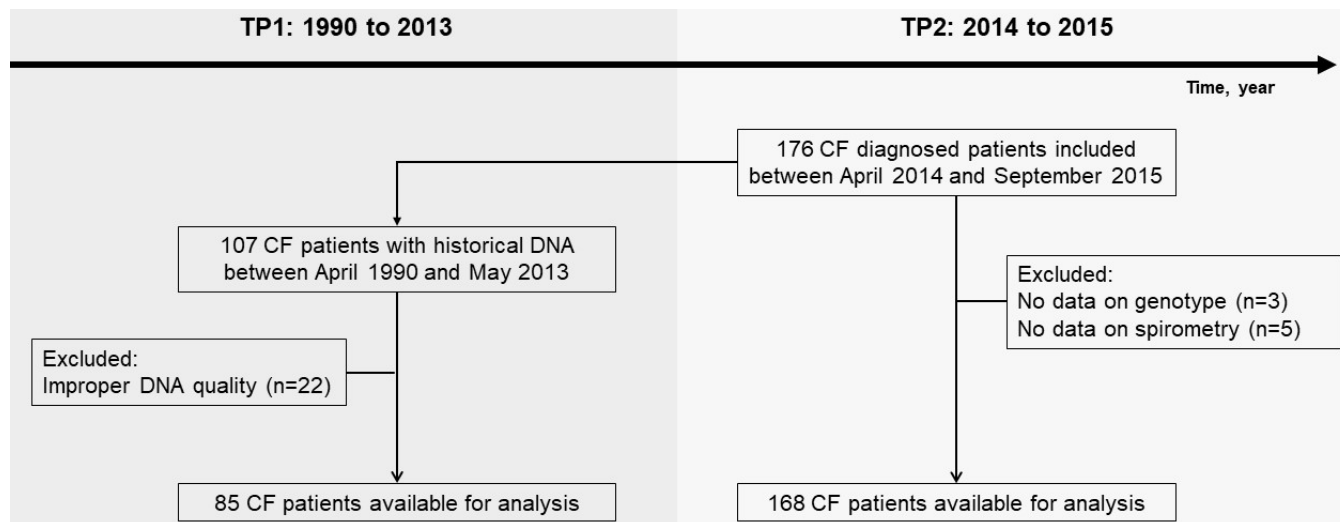

**Supplementary Figure 1. Comprehensive time-line with participant selection.** In total 176 CF patients were included between April 2014 and September 2015 (timepoint 2, TP2). Due to missing data a final sample size of 168 patients with qualitative TL measurements were available at TP2. A historical DNA sample and a qualitative TL measurement from a subgroup of patients (n=85), participating at TP2, were available between April 1990 and May 2013 (timepoint 1, TP1).
