# Supplementary material for: Leukocyte telomere length and attrition in association with disease severity in cystic fibrosis patients
Source: publisher site journal article supplement (doi:10.18632/aging.206093), 2024-08-29
Supplement: Supplementary file [file aging-v16i16-206093-supplementary-material-SD3.pdf]

## SUPPLEMENTARY TABLES

**Supplementary Table 1. List of active substances administered as inhaled corticosteroids (ICS).**

| Active substance(s)                                                    | No. (%)  |
|------------------------------------------------------------------------|----------|
| Budesonide (ICS)/Formoterol fumarate dihydrate (LABA)                  | 39 (55%) |
| Fluticasone propionate (ICS)/Salmeterol (LABA)                         | 22 (31%) |
| Fluticasone propionate (ICS)                                           | 9 (13%)  |
| Beclometasone dipropionate (ICS) /formoterol fumarate dihydrate (LABA) | 1 (1%)   |

In total, 70 out of 168 included patients were prescribed ICS. In most cases, it concerned a drug combining a long-acting bronchodilator (LABA) and an inhaled corticosteroid (ICS).

**Supplementary Table 2. Genotype-specific non-linear age association with LTL attrition in CF patients (n=85) correction for regression to the mean.**

| Genotype     | Age | $\beta$ (95% CI)        | P-value |
|--------------|-----|-------------------------|---------|
| Homozygous   | 1   | 0.022 (0.005, 0.039)    | 0.011   |
| Heterozygous | 1   | 0.001 (-0.013, 0.014)   | 0.93    |
| Homozygous   | 5   | 0.013 (0.002, 0.024)    | 0.018   |
| Heterozygous | 5   | -0.001 (-0.011, 0.009)  | 0.89    |
| Homozygous   | 17  | -0.012 (-0.022, -0.002) | 0.021   |
| Heterozygous | 17  | -0.004 (-0.009, 0.001)  | 0.084   |

Estimates presented with 95%CI representing the association between  $\Delta$ LTL (with correction for regression to the mean as postulated by Verhulst and colleagues [2]) and age at TP1 for each year increment at different ages (1, 5, and 17 years, based on 25<sup>th</sup>, median and 75<sup>th</sup> percentile of the age distribution). Models adjusted for sex and time between samples within an individual. P-interaction between the quadratic term of age at TP1 and genotype ( $P=0.039$ ), reflecting the genotype-specific non-linear LTL attrition-age association. In total 44 patients were homozygous for the  $\Delta$ F508 mutation and 41 were heterozygous.
